# Supplementary material for: Linkage disequilibrium and haplotype block patterns in popcorn populations
Source: PLOS journal article supplement (doi:10.1371/journal.pone.0219417), 2019-09-25

**S4 Fig.** LD heatmaps for five segments of 100 SNPs along chromosome 4 in the biparental population; the regions covered ranged from approximately 1.4 to 6.0 Mb; the  $r^2$  and  $|D'|$  values are above and below the diagonal, respectively.

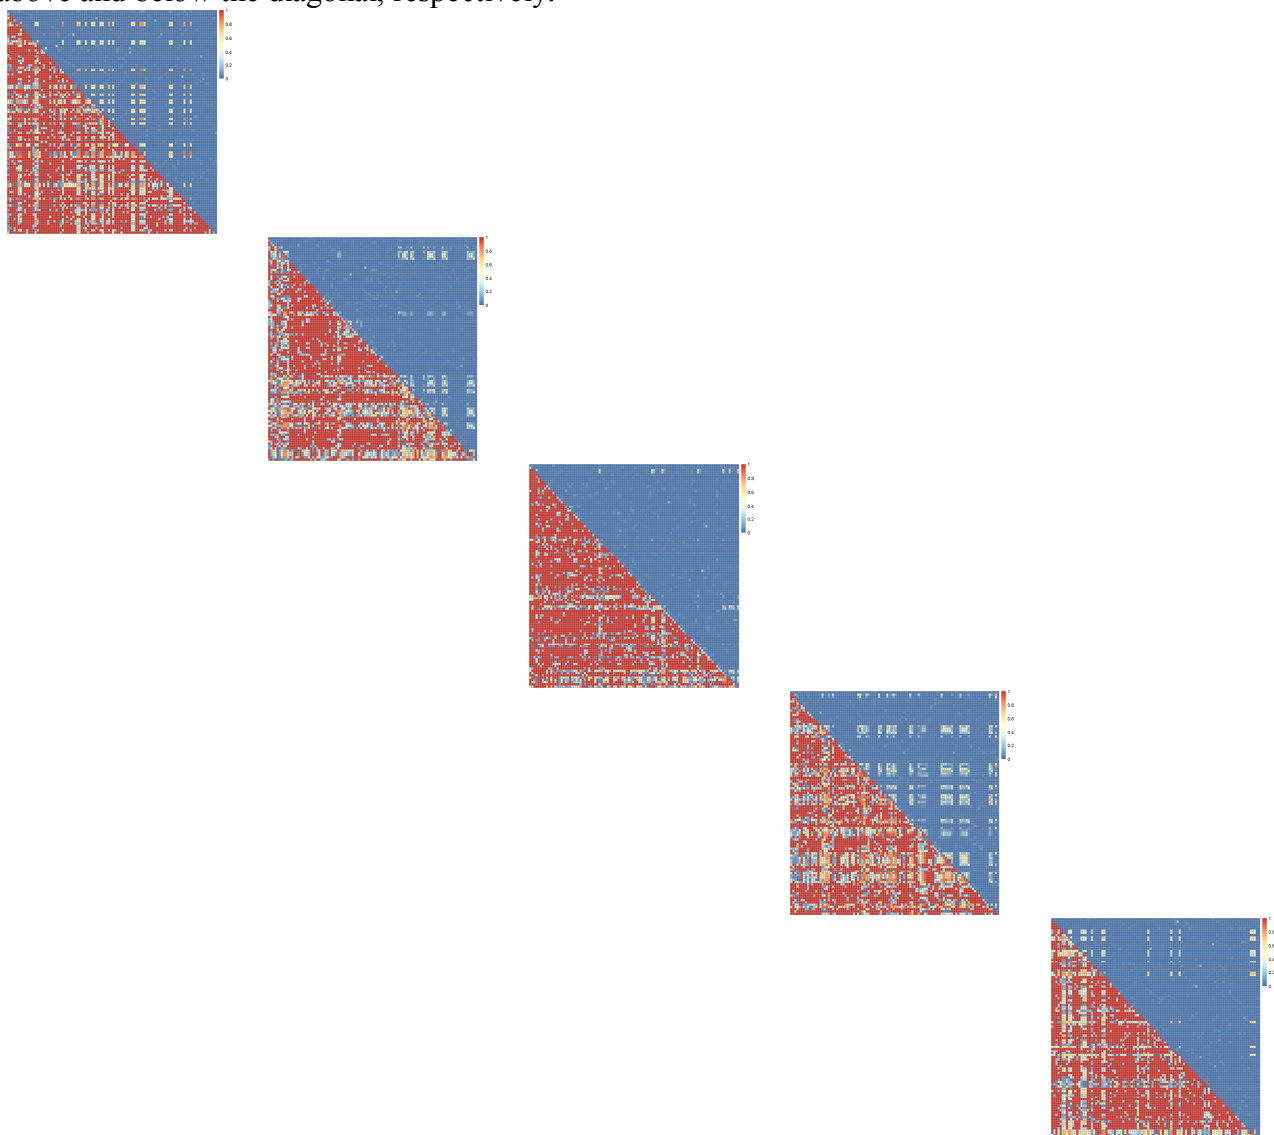

Supplement: S6 (10.1371/journal.pone.0219417.s006) [file journal.pone.0219417.s006]
